# Supplementary material
Source: publisher site journal article supplement (https://www.dovepress.com/article/492309)
Supplement: Supplementary file 1 [file get_supplementary_file.php]

**Supplementary information**

**Table S1** Causality inference of SRPs (exposures) on ISSNHL.

| **Exposure and Method** | **SNP, n** | **p-value** | **OR(95%CI)** | **b** | **se** | **p-het** | **P-intercept** | **F-statistics** |
| --- | --- | --- | --- | --- | --- | --- | --- | --- |
| **Sleeplessness / insomnia (ukb-b-3957)** | | | |  |  |  |  | 44.935 |
| MR Egger | 39 | 0.709 | 1.958(0.059,65.41) | 0.672 | 1.79 | 0.35 | 0.731 |  |
| Weighted median | 39 | 0.687 | 0.699(0.123,3.989) | -0.358 | 0.889 |  |  |  |
| Inverse variance weighted | 39 | 0.852 | 1.119(0.344,3.641) | 0.112 | 0.602 | 0.388 |  |  |
| Simple mode | 39 | 0.473 | 0.29(0.01,8.258) | -1.237 | 1.708 |  |  |  |
| Weighted mode | 39 | 0.584 | 0.503(0.044,5.772) | -0.688 | 1.245 |  |  |  |
| **Sleeplessness / insomnia (ukb-a-13)** | | | |  |  |  |  | 38.995 |
| MR Egger | 27 | 0.431 | 4.756(0.104,216.904) | 1.56 | 1.949 | 0.269 | 0.348 |  |
| Weighted median | 27 | 0.645 | 0.639(0.095,4.305) | -0.448 | 0.974 |  |  |  |
| Inverse variance weighted | 27 | 0.785 | 0.83(0.217,3.173) | -0.187 | 0.684 | 0.27 |  |  |
| Simple mode | 27 | 0.413 | 0.194(0.004,9.263) | -1.64 | 1.972 |  |  |  |
| Weighted mode | 27 | 0.662 | 0.551(0.039,7.741) | -0.595 | 1.348 |  |  |  |
| **Sleep duration** | | | |  |  |  |  | 42.619 |
| MR Egger | 68 | 0.847 | 1.462(0.032,67.723) | 0.38 | 1.957 | 0.084 | 0.731 |  |
| Weighted median | 68 | 0.975 | 1.02(0.284,3.667) | 0.02 | 0.653 |  |  |  |
| Inverse variance weighted | 68 | 0.579 | 0.761(0.289,1.998) | -0.274 | 0.493 | 0.096 |  |  |
| Simple mode | 68 | 0.572 | 2.487(0.107,57.897) | 0.911 | 1.606 |  |  |  |
| Weighted mode | 68 | 0.308 | 3.663(0.308,43.57) | 1.298 | 1.263 |  |  |  |
| **Daytime dozing / sleeping** | | | |  |  |  |  | 44.077 |
| MR Egger | 31 | 0.542 | 0.06(0,457.436) | -2.813 | 4.56 | 0.585 | 0.994 |  |
| Weighted median | 31 | 0.108 | 0.099(0.006,1.668) | -2.315 | 1.442 |  |  |  |
| Inverse variance weighted | 31 | 0.005 | 0.058(0.008,0.417) | -2.845 | 1.006 | 0.636 |  |  |
| Simple mode | 31 | 0.045 | 0.003(0,0.701) | -5.798 | 2.777 |  |  |  |
| Weighted mode | 31 | 0.164 | 0.031(0,3.643) | -3.463 | 2.426 |  |  |  |
| **Daytime nap** | | | |  |  |  |  | 33.641 |
| MR Egger | 93 | 0.009 | 0.008(0,0.282) | -4.807 | 1.807 | 0.194 | 0.006 |  |
| Weighted median | 93 | 0.767 | 0.808(0.196,3.321) | -0.214 | 0.721 |  |  |  |
| Inverse variance weighted | 93 | 0.986 | 1.009(0.365,2.79) | 0.009 | 0.519 | 0.086 |  |  |
| Simple mode | 93 | 0.249 | 0.099(0.002,4.912) | -2.31 | 1.991 |  |  |  |
| Weighted mode | 93 | 0.111 | 0.099(0.006,1.654) | -2.31 | 1.436 |  |  |  |
| **Nap during day** | | | |  |  |  |  | 31.003 |
| MR Egger | 48 | 0.09 | 0.022(0,1.641) | -3.802 | 2.193 | 0.47 | 0.066 |  |
| Weighted median | 48 | 0.512 | 1.698(0.349,8.265) | 0.53 | 0.807 |  |  |  |
| Inverse variance weighted | 48 | 0.737 | 1.212(0.396,3.707) | 0.192 | 0.571 | 0.37 |  |  |
| Simple mode | 48 | 0.555 | 2.88(0.088,93.971) | 1.058 | 1.778 |  |  |  |
| Weighted mode | 48 | 0.54 | 2.557(0.13,50.419) | 0.939 | 1.521 |  |  |  |
| **Sleep disorders (combined)** | | | |  |  |  |  | 37.133 |
| MR Egger | 13 | 0.892 | 0.894(0.183,4.369) | -0.112 | 0.81 | 0.846 | 0.834 |  |
| Weighted median | 13 | 0.772 | 0.91(0.483,1.715) | -0.094 | 0.323 |  |  |  |
| Inverse variance weighted | 13 | 0.82 | 1.055(0.663,1.679) | 0.054 | 0.237 | 0.893 |  |  |
| Simple mode | 13 | 0.557 | 0.746(0.288,1.931) | -0.293 | 0.485 |  |  |  |
| Weighted mode | 13 | 0.601 | 0.781(0.317,1.925) | -0.247 | 0.46 |  |  |  |
| **Sleep apnoea** | | | |  |  |  |  | 37.836 |
| MR Egger | 20 | 0.853 | 1.158(0.253,5.303) | 0.146 | 0.776 | 0.227 | 0.765 |  |
| Weighted median | 20 | 0.708 | 1.106(0.652,1.876) | 0.101 | 0.27 |  |  |  |
| Inverse variance weighted | 20 | 0.694 | 0.923(0.617,1.379) | -0.081 | 0.205 | 0.273 |  |  |
| Simple mode | 20 | 0.872 | 1.082(0.42,2.791) | 0.079 | 0.483 |  |  |  |
| Weighted mode | 20 | 0.69 | 1.171(0.546,2.512) | 0.158 | 0.39 |  |  |  |


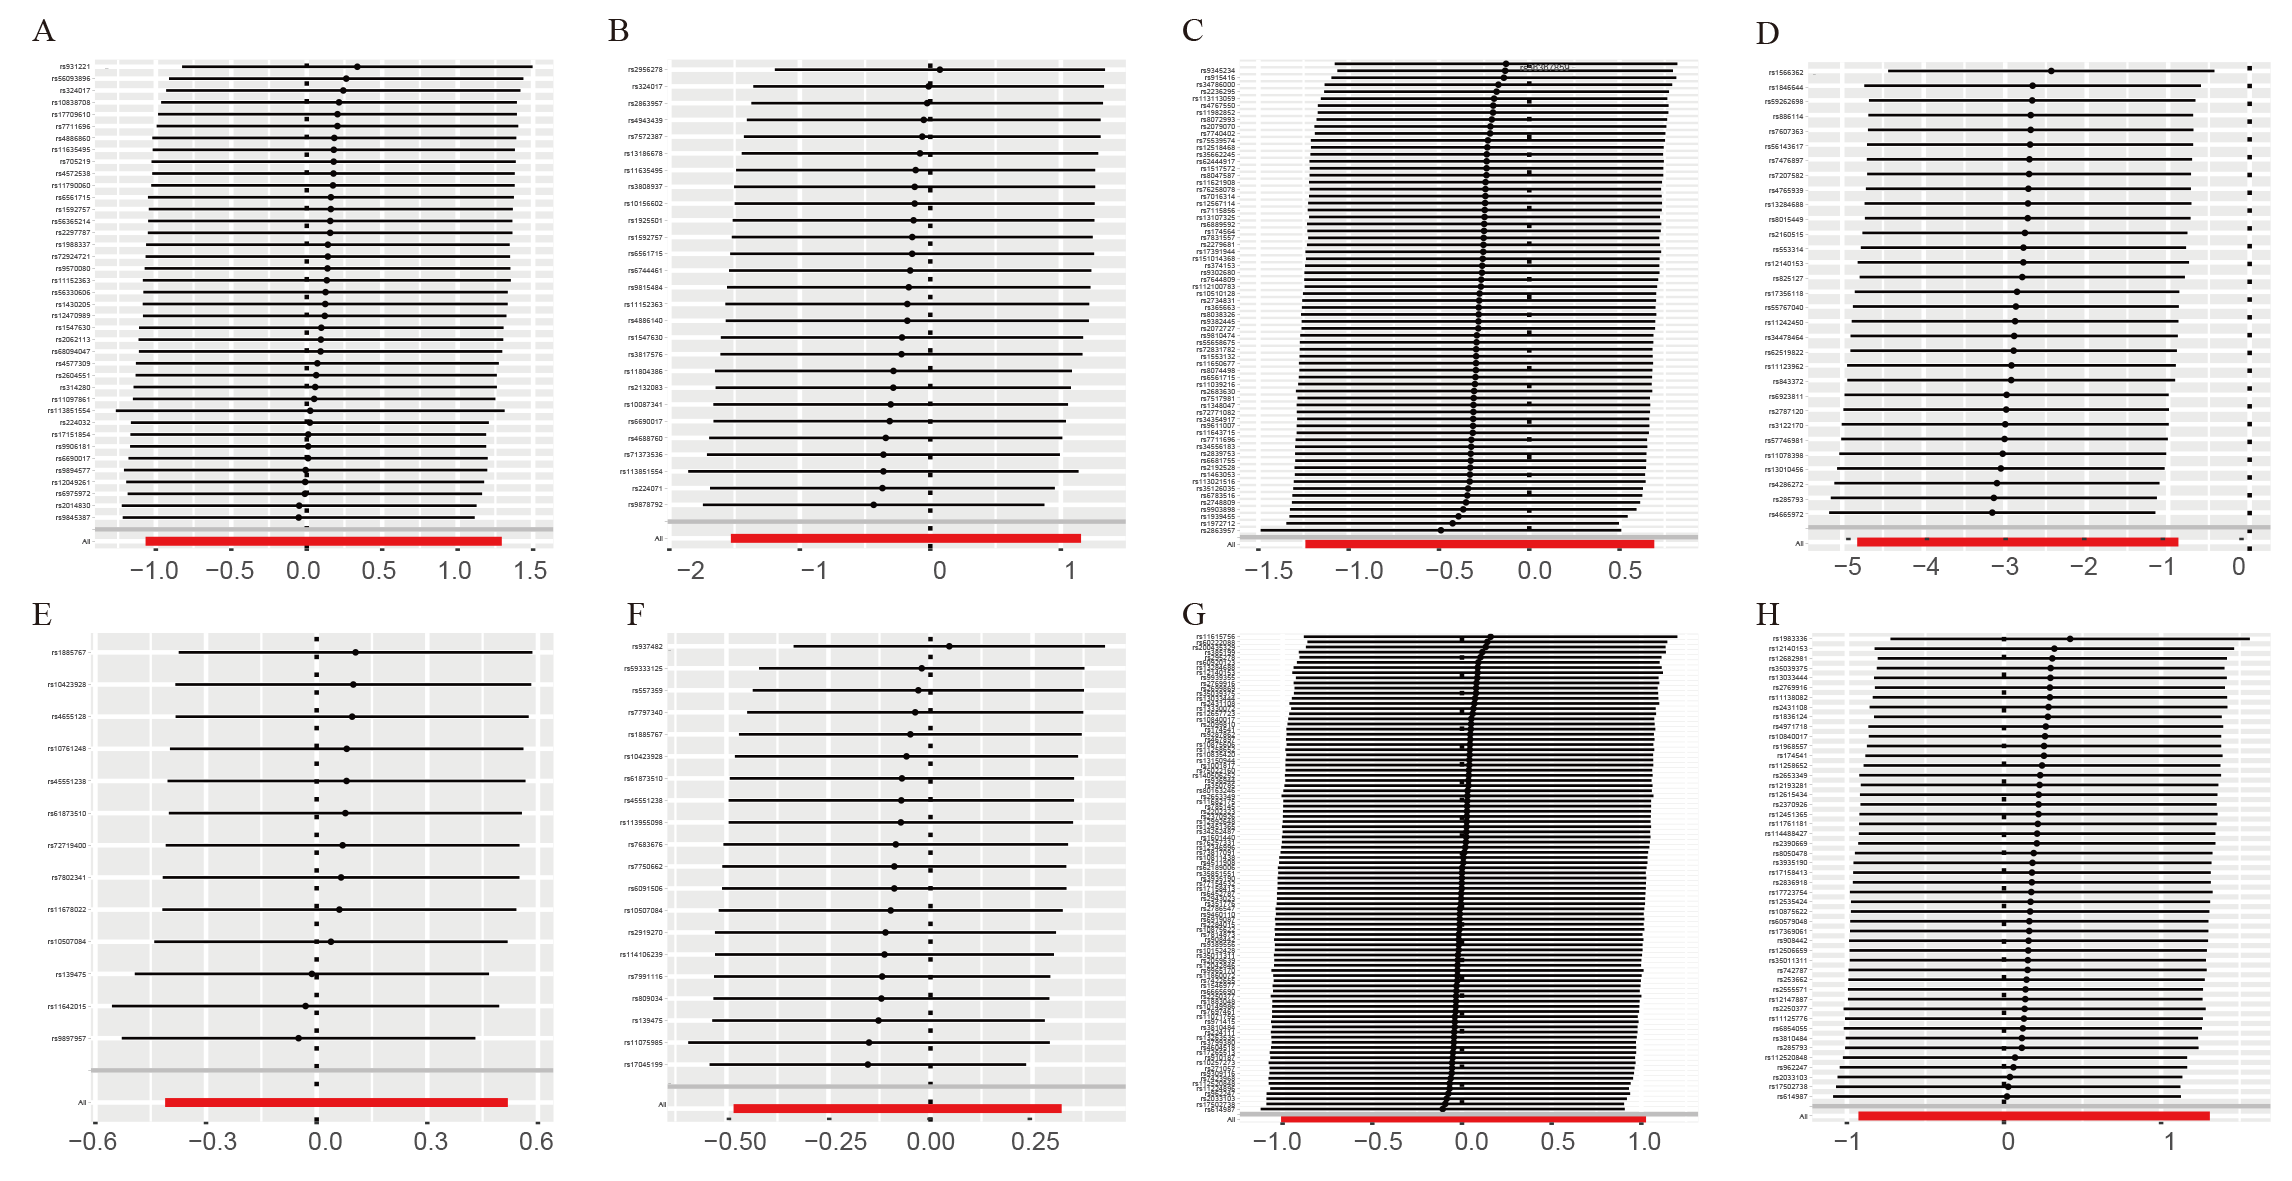


**Figure S1** Leave-one-out plots for the MR analyses of SRPs on ISSNHL. The analyzed SRPs included (A) sleeplessness / insomnia (ukb-b-3957), (B) sleeplessness / insomnia (ukb-a-13), (C) sleep duration, (D) daytime dozing / sleeping, (E) sleep disorders (combined), (F) sleep apnoea (including avohilmo), (G) daytime nap, and (H) nap during day.
